# Supplementary material
Source: HighWire-hosted journal article supplement (https://bmjopen.bmj.com/content/12/3/e059021)
Supplement: inline-supplementary-material-2 [file inline-supplementary-material-2.pdf]

**Supplementary Table S1:** Sex chromosome determination of miscalled genotyped CLSA participants

| Self reported sex | Affymetrix sex corrected by SVM | PLINK sex (raw F estimate <0.3 female raw F estimate >0.8 male) | discordance in section Sex chromosome composition | PLINK sex (adjusted F estimate <0.4 female adjusted F estimate >0.8 male) | sex determined by combined Affymetrix/PLINK/CNV approach | CLSA self-reported phenotype | chromosomal abnormality from CNV profile | Raw F estimate | Adjusted F estimate |
|-------------------|---------------------------------|-----------------------------------------------------------------|---------------------------------------------------|---------------------------------------------------------------------------|----------------------------------------------------------|------------------------------|------------------------------------------|----------------|---------------------|
| male              | female                          | female                                                          | 1                                                 | female                                                                    | female                                                   |                              | No abnormality                           | -0.00301       | 0.01745             |
| male              | male                            | female                                                          | 1                                                 | female                                                                    | male                                                     |                              | Klinefelter Syndrome (47,XXY)            | 0.1048         | 0.1002              |
| female            | male                            | male                                                            | 1                                                 | male                                                                      | male                                                     |                              | No abnormality                           | 1              | 1                   |
| male              | female                          | female                                                          | 1                                                 | female                                                                    | female                                                   |                              | No abnormality                           | 0.01533        | 0.02791             |
| female            | female                          | unknown                                                         |                                                   | female                                                                    | female                                                   |                              | Low heterozygosity on chrX               | 0.3495         | 0.3644              |
| female            | female                          | unknown                                                         | 1                                                 | unknown                                                                   | female                                                   |                              | 45,X/46,XX mosaicism                     | 0.5095         | 0.4773              |
| female            | female                          | unknown                                                         | 1                                                 | unknown                                                                   | female                                                   |                              | Low heterozygosity on chrX               | 0.4637         | 0.4485              |
| female            | female                          | unknown                                                         | 1                                                 | unknown                                                                   | female                                                   |                              | Low heterozygosity on chrX               | 0.4352         | 0.4746              |
| male              | female                          | female                                                          | 1                                                 | female                                                                    | female                                                   |                              | No abnormality                           | 0.008892       | 0.03223             |
| female            | male                            | male                                                            | 1                                                 | male                                                                      | male                                                     |                              | No abnormality                           | 1              | 1                   |
| female            | male                            | male                                                            | 1                                                 | male                                                                      | male                                                     |                              | No abnormality                           | 1              | 1                   |
| male              | female                          | female                                                          | 1                                                 | female                                                                    | female                                                   |                              | No abnormality                           | -0.03065       | -0.02794            |
| female            | female                          | male                                                            | 1                                                 | male                                                                      | female                                                   | Turner Syndrome              | Turner Syndrome (45,X)                   | 0.9507         | 0.9614              |
| female            | male                            | male                                                            | 1                                                 | male                                                                      | male                                                     |                              | No abnormality                           | 1              | 1                   |
| female            | female                          | unknown                                                         |                                                   | female                                                                    | female                                                   |                              | Low heterozygosity on chrX               | 0.3043         | 0.2802              |
| male              | female                          | female                                                          | 1                                                 | female                                                                    | female                                                   |                              | No abnormality                           | -0.002689      | -0.01603            |
| female            | male                            | male                                                            | 1                                                 | male                                                                      | male                                                     |                              | No abnormality                           | 1              | 1                   |
| male              | male                            | unknown                                                         | 1                                                 | female                                                                    | male                                                     |                              | Klinefelter Syndrome (47,XXY)            | 0.3124         | 0.3235              |
| female            | male                            | male                                                            | 1                                                 | male                                                                      | male                                                     |                              | No abnormality                           | 1              | 1                   |
| male              | male                            | unknown                                                         | 1                                                 | unknown                                                                   | male                                                     |                              | No abnormality                           | 0.6854         | 0.6878              |
| male              | male                            | unknown                                                         | 1                                                 | unknown                                                                   | male                                                     |                              | 45,X/46,XY mosaicism                     | 0.5798         | 0.5893              |
| female            | female                          | male                                                            | 1                                                 | male                                                                      | female                                                   |                              | Turner Syndrome (45,X)                   | 0.9792         | 0.9875              |
| female            | male                            | male                                                            | 1                                                 | male                                                                      | male                                                     |                              | No abnormality                           | 1              | 1                   |
| male              | female                          | female                                                          | 1                                                 | female                                                                    | female                                                   |                              | No abnormality                           | 0.04474        | 0.03819             |
| female            | female                          | male                                                            | 1                                                 | male                                                                      | female                                                   |                              | Turner Syndrome (45,X)                   | 0.9439         | 0.9545              |
| male              | male                            | unknown                                                         |                                                   | male                                                                      | male                                                     |                              | 45,X/46,XY mosaicism                     | 0.7965         | 0.8497              |
| female            | female                          | unknown                                                         | 1                                                 | unknown                                                                   | female                                                   |                              | Low heterozygosity on chrX               | 0.4524         | 0.4305              |
| male              | female                          | male                                                            |                                                   | male                                                                      | female                                                   |                              | 45,X/46,XY mosaicism                     | 0.9748         | 0.986               |
| female            | female                          | unknown                                                         | 1                                                 | unknown                                                                   | female                                                   |                              | Low heterozygosity on chrX               | 0.5457         | 0.5504              |

|        |        |         |   |         |        |                      |                               |           |           |
|--------|--------|---------|---|---------|--------|----------------------|-------------------------------|-----------|-----------|
| male   | female | male    |   | male    | male   |                      | 45,X/46,XY mosaicism          | 0.9678    | 0.9797    |
| female | female | male    | 1 | unknown | female |                      | Low heterozygosity on chrX    | 0.8076    | 0.7966    |
| female | male   | male    | 1 | male    | male   |                      | No abnormality                | 1         | 1         |
| female | male   | unknown | 1 | male    | female | Turner Syndrome      | 45,X/46,XY mosaicism          | 0.7827    | 0.8404    |
| male   | male   | female  | 1 | female  | male   |                      | Klinefelter Syndrome (47,XXY) | -0.0457   | -0.04304  |
| female | female | male    | 1 | male    | female |                      | Turner Syndrome (45,X)        | 0.879     | 0.9028    |
| female | female | unknown |   | female  | female |                      | Low heterozygosity on chrX    | 0.3035    | 0.3339    |
| male   | male   | unknown | 1 | unknown | male   |                      | 45,X/46,XY mosaicism          | 0.6732    | 0.7016    |
| male   | male   | female  | 1 | female  | male   | Klinefelter Syndrome | Klinefelter Syndrome (47,XXY) | -0.03886  | -0.02651  |
| female | male   | male    | 1 | male    | male   |                      | No abnormality                | 1         | 1         |
| male   | male   | unknown | 1 | female  | male   |                      | Klinefelter Syndrome (47,XXY) | 0.3093    | 0.2872    |
| male   | female | male    |   | male    | male   |                      | 45,X/46,XY mosaicism          | 1         | 0.9603    |
| female | female | male    | 1 | male    | female | Turner Syndrome      | Turner Syndrome (45,X)        | 0.9273    | 0.9527    |
| female | female | unknown |   | female  | female |                      | Low heterozygosity on chrX    | 0.4004    | 0.3584    |
| female | female | unknown | 1 | unknown | female |                      | Low heterozygosity on chrX    | 0.3838    | 0.4362    |
| male   | male   | unknown |   | male    | male   |                      | 45,X/46,XY mosaicism          | 0.7707    | 0.8358    |
| female | female | unknown |   | female  | female |                      | Low heterozygosity on chrX    | 0.3978    | 0.3886    |
| female | female | unknown | 1 | unknown | female |                      | Low heterozygosity on chrX    | 0.7748    | 0.7842    |
| female | female | unknown |   | female  | female |                      | No abnormality                | 0.3298    | 0.3527    |
| male   | male   | unknown | 1 | unknown | male   |                      | 45,X/46,XY mosaicism          | 0.6658    | 0.7601    |
| male   | female | male    |   | male    | male   |                      | 45,X/46,XY mosaicism          | 1         | 0.9827    |
| female | female | unknown | 1 | unknown | female |                      | 45,X/46,XX mosaicism          | 0.4148    | 0.4228    |
| male   | female | female  | 1 | female  | female |                      | No abnormality                | -0.003668 | -0.01753  |
| female | female | unknown |   | female  | female |                      | Low heterozygosity on chrX    | 0.3489    | 0.2975    |
| female | male   | male    | 1 | male    | male   |                      | No abnormality                | 1         | 1         |
| male   | female | female  | 1 | female  | female |                      | No abnormality                | -0.02345  | -0.01932  |
| male   | male   | female  | 1 | female  | male   | Klinefelter Syndrome | Klinefelter Syndrome (47,XXY) | -0.03581  | -0.02924  |
| female | female | unknown | 1 | unknown | female |                      | 45,X/46,XX mosaicism          | 0.5139    | 0.5022    |
| female | female | unknown |   | female  | female |                      | Low heterozygosity on chrX    | 0.3461    | 0.3336    |
| male   | female | female  | 1 | female  | female |                      | No abnormality                | 0.01936   | -0.006017 |
| male   | female | female  | 1 | female  | female |                      | No abnormality                | -0.04206  | -0.0411   |
| female | male   | male    | 1 | male    | male   |                      | No abnormality                | 1         | 1         |
| male   | female | male    |   | male    | male   |                      | 45,X/46,XY mosaicism          | 0.9756    | 0.9832    |

|      |      |         |   |         |      |                      |      |        |
|------|------|---------|---|---------|------|----------------------|------|--------|
| male | male | unknown | 1 | unknown | male | 45,X/46,XY mosaicism | 0.72 | 0.7971 |
|------|------|---------|---|---------|------|----------------------|------|--------|
