# Supplementary material
Source: HighWire-hosted journal article supplement (https://bmjopen.bmj.com/content/12/3/e059021)
Supplement: inline-supplementary-material-4 [file inline-supplementary-material-4.pdf]

**Supplementary Table S3:** Comparison of HLA types in positive controls with known types in literature

| HLA locus | NA10859<br>(1347-02) <sup>a</sup> | NA10859<br>(1347-02) | NA10859<br>(1347-02)                      | NA12878 (1463-02)                                | NA12878<br>(1463-02) | NA12878<br>(1463-02)         | NA24385 (HG002<br>(NIST RM 8391)) | NA24385 (HG002<br>(NIST RM 8391)) | NA24385 (HG002<br>(NIST RM 8391)) |
|-----------|-----------------------------------|----------------------|-------------------------------------------|--------------------------------------------------|----------------------|------------------------------|-----------------------------------|-----------------------------------|-----------------------------------|
|           | Reference<br>Genotype             | No of<br>replicates  | Accuracy(%)/<br>Call rate(%) <sup>d</sup> | Reference Genotype                               | No of<br>replicates  | Accuracy(%)/<br>Call rate(%) | Reference<br>Genotype             | No of replicates                  | Accuracy(%)/<br>Call rate(%)      |
| A         | 03:01/01:01 <sup>b</sup>          | 4                    | 100/100                                   | 01:01/11:01 <sup>e</sup>                         | 587                  | 100/100                      | 26:01/01:01 <sup>f</sup>          | 75                                | 100/100                           |
| B         | 07:02/15:01 <sup>b</sup>          | 4                    | 100/100                                   | 08:01/56:01 <sup>e</sup>                         | 587                  | 100/100                      | 38:01/35:08 <sup>f</sup>          | 75                                | -                                 |
| C         | 06:02/07:02 <sup>b</sup>          | 4                    | 100/100                                   | 01:02/07:01 <sup>e</sup>                         | 587                  | 100/100                      | 12:03/04:01 <sup>f</sup>          | 75                                | 100/100                           |
| DPA1      | 01:03/01:03 <sup>b</sup>          | 4                    | 100/100                                   | 01:03/02:01 <sup>e</sup>                         | 587                  | 100/100                      | 01:03/01:03 <sup>f</sup>          | 75                                | 100/100                           |
| DPB1      | 04:02/04:02 <sup>b</sup>          | 4                    | 100/100                                   | 04:01/14:01 <sup>e</sup>                         | 587                  | 100/100                      | 04:01/04:01 <sup>g</sup>          | 75                                | 100/100                           |
| DQA1      | 01:02/03:01 <sup>b</sup>          | 4                    | 100/100                                   | 01:01/05:01 <sup>e</sup>                         | 587                  | 100/100                      | 03:01/01:01 <sup>h</sup>          | 75                                | 100/100                           |
| DQB1      | 03:02/06:02 <sup>b</sup>          | 4                    | 100/100                                   | 02:01/05:01 <sup>e</sup>                         | 587                  | 100/100                      | 05:01/03:02 <sup>f</sup>          | 75                                | 100/100                           |
| DRB1      | 04:01/15:01 <sup>b</sup>          | 4                    | 100/100                                   | 01:01/03:01 <sup>e</sup>                         | 587                  | 100/100                      | 04:02/10:01 <sup>f</sup>          | 75                                | 100/100                           |
| DRB3      | NA <sup>b,c</sup>                 | 4                    | -                                         | 01:01/01:01;01:01/02:02 <sup>e</sup>             | 587                  | 100/100                      | NA <sup>f</sup>                   | 75                                | -                                 |
| DRB4      | 01 <sup>b</sup>                   | 4                    | 100/100                                   | 01:01/01:01;01:03/01:03;01:06/01:06 <sup>e</sup> | 587                  | -                            | 01:03 <sup>f</sup>                | 75                                | 100/100                           |
| DRB5      | NA <sup>b,c</sup>                 | 4                    | -                                         | NA <sup>e</sup>                                  | 587                  | -                            | NA <sup>f</sup>                   | 75                                | -                                 |

Note: a- Coriell ID (CEPH Family ID or NIST ID/RM Number for Personal Genome Project sample)

b: reference genotype source-IPD-IMGT/HLADatabase

c: reference genotype data is not available

d: call rate is based on a posterior probability call threshold of 0.7

e: reference genotype source-PLoS Comput Biol. 2016 Oct; 12(10): e1005151. PMID: 27792722. A set of possible alleles are reported in the reference. The HLA types we validated are shown in the table.

f: reference genotype source-DOI: 10.12688/f1000research.19630.1

g: reference genotype source-DOI: 10.12688/f1000research.19630.1 and <https://www.pacb.com/wp-content/uploads/Rowell-CSHLBioData-2018-Comprehensive-Variant-Detection-in-a-Human-Genome-with-PacBio-High-Fidelity-Reads.pdf>. The HLA types we validated are shown in the table.

h: reference genotype source-DOI: 10.12688/f1000research.19630.1 and Nature Communications doi: 10.1038/s41467-020-18564-9. The HLA types we validated are shown in the table.
